# Supplementary material
Source: publisher figshare collection journal article supplement (https://sage.figshare.com/ndownloader/files/18057695)
Supplement: Supplementary file 1 [file 18057695]

## Appendix A: Articles included in Integrative Review

| Authors                                                                             | Year | Methodology       | Time                         | Group                                                                                                          |
|-------------------------------------------------------------------------------------|------|-------------------|------------------------------|----------------------------------------------------------------------------------------------------------------|
| Stacey, Averett, & Knox                                                             | 2018 | Mixed Methodology | Cross-sectional              | Lesbian                                                                                                        |
| Stevens, Korchmaros, & Miller                                                       | 2010 | Quantitative      | Cross-sectional              | Lesbian, Heterosexual Women                                                                                    |
| McRae, Daire, Abel, & Lambie                                                        | 2017 | Quantitative      | Cross-sectional              | Gay, Lesbian, Bisexual                                                                                         |
| Mustanski, Andrews, Herrick, Stall, & Schnarrs                                      | 2014 | Quantitative      | Cross-sectional longitudinal | Men who have sex with men (MSM), Men who have sex with men and women (MSMW), Men who have sex with women (MSW) |
| Rausch                                                                              | 2016 | Quantitative      | Cross-sectional              | Lesbian                                                                                                        |
| Herrick, How Lim, Plankey, Chmiel, Guadamuz, Kao, Shoptaw, Carrico, Ostrow, & Stall | 2013 | Quantitative      | Cross sectional longitudinal | Men who have sex with men (MSM)                                                                                |
| Guadalupe-Diaz                                                                      | 2013 | Quantitative      | Cross-sectional              | LGBQ                                                                                                           |
| Guadalupe-Diaz & Barredo                                                            | 2013 | Quantitative      | Cross-sectional              | Gay, Lesbian, Bisexual                                                                                         |
| Finneran & Stephenson                                                               | 2014 | Quantitative      | Cross-sectional              | Gay, Bisexual                                                                                                  |
| Crittenden, Policastro, & Eigenberg                                                 | 2017 | Quantitative      | Cross-sectional              | LGBQ                                                                                                           |
| Rhodes, McCoy, Wilkin, & Wolfson                                                    | 2009 | Quantitative      | Cross-sectional              | Gay                                                                                                            |

|                                                |      |                   |                 |                                 |
|------------------------------------------------|------|-------------------|-----------------|---------------------------------|
| Sylaska & Edwards                              | 2015 | Mixed Methodology | Cross-sectional | LGBTQ, Questioning              |
| Guadalupe-Diaz & Anthony                       | 2016 | Qualitative       | Cross-sectional | Transgender                     |
| Kelley, Lewis, & Mason                         | 2015 | Quantitative      | Cross-sectional | Lesbian                         |
| McLaughlin, Hatzenbuehler, Xuan, & Conron      | 2012 | Quantitative      | Cross-sectional | Gay, Lesbian, Bisexual          |
| Jacobson, Daire, Abel, & Lambie                | 2015 | Quantitative      | Cross-sectional | LGBTQ                           |
| Wong, Weiss, Ayala, & Kipke                    | 2010 | Mixed Methodology | Cross-sectional | Men who have sex with men (MSM) |
| Tesch & Bekerian                               | 2015 | Qualitative       | Cross-sectional | Transgender                     |
| Carvalho, Lewis, Derlega, Winstead, & Viggiano | 2011 | Quantitative      | Cross-sectional | Gay, Lesbian                    |
| Jacobson, Daire, & Abel                        | 2015 | Quantitative      | Cross-sectional | LGBTQ                           |
| Finneran & Stephenson                          | 2014 | Quantitative      | Cross-sectional | Men who have sex with men (MSM) |
| Miller & Irvin                                 | 2017 | Quantitative      | Cross-sectional | Gay, Lesbian, Bisexual          |
| Turell, Herrmann, Hollander, & Galletly        | 2012 | Qualitative       | Cross-sectional | 9 (LGBT)                        |
| Oswalk, Fonseca, & Hardesty                    | 2010 | Qualitative       | Cross-sectional | Lesbian                         |
| Register                                       | 2018 | Qualitative       | Cross-sectional | Lesbian                         |

|                                                                                                                      |      |              |                 |                                                                    |
|----------------------------------------------------------------------------------------------------------------------|------|--------------|-----------------|--------------------------------------------------------------------|
| Simpson & Helfrich                                                                                                   | 2014 | Qualitative  | Cross-sectional | Lesbian, Bisexual                                                  |
| Little & Terrance                                                                                                    | 2010 | Quantitative | Cross-sectional | 9 (participants were general population)                           |
| Brown & Groscup                                                                                                      | 2009 | Quantitative | Cross-sectional | Gay, Lesbian                                                       |
| Edwards & Sylaska                                                                                                    | 2016 | Quantitative | Cross-sectional | Gay, Lesbian                                                       |
| Hellmuth, Follansbee, Moore, & Stuart                                                                                | 2008 | Qualitative  | Longitudinal    | Gay                                                                |
| Williams, Wilton, Magnus, Wang, Want, Dyer, Koblin, Hucks-Ortiz, Fields, Shoptaw, Stephenson, O'Cleirigh, & Cummings | 2015 | Quantitative | Cross-sectional | Men who have sex with men (MSM)                                    |
| McCauley, Silverman, Decker, Agenor, Borrero, Tancredi, Zelazny, & Miller                                            | 2015 | Quantitative | Cross-sectional | Women who have sex with women and men, women who have sex with men |
| Parsons, Grov, & Golub                                                                                               | 2012 | Quantitative | Cross-sectional | Gay, Bisexual, Men who have sex with men                           |
| Jessup, Dibble, & Cooper                                                                                             | 2012 | Quantitative | Cross-sectional | Lesbian, Bisexual                                                  |
| Andrasik, Valentine, & Pantalone                                                                                     | 2013 | Qualitative  | Cross-sectional | Men who have sex with men (MSM)                                    |
| Walters                                                                                                              | 2011 | Qualitative  | Cross-sectional | Lesbian                                                            |

|                                                                                                                        |      |              |                 |                                                     |
|------------------------------------------------------------------------------------------------------------------------|------|--------------|-----------------|-----------------------------------------------------|
| Martinez, Wu, Levine, Munoz-Laboy, Spadafino, Dodge, Rhodes, Rios, Ovejero, Moya, Baray, Carballo-Diequez, & Fernandez | 2016 | Quantitative | Cross-sectional | Men who have sex with men (MSM), Transgender        |
| Brennan, Kuhns, Johnson, Belzer, Wilson, & Garofalo                                                                    | 2012 | Quantitative | Cross-sectional | Transgender, not identifying with male birth gender |
| Rausch                                                                                                                 | 2016 | Quantitative | Cross-sectional | Lesbian, Mixed                                      |
| Guadalupe-Diaz & Yglesias                                                                                              | 2013 | Quantitative | Cross-sectional | Gay, Lesbian, Bisexual                              |
| Edwards & Sylaska                                                                                                      | 2013 | Quantitative | Cross-sectional | LGBTQ                                               |
| Seelman                                                                                                                | 2015 | Quantitative | Cross-sectional | Transgender, gender non-conforming                  |
| Sorenson & Thomas                                                                                                      | 2009 | Quantitative | Cross-sectional | Gay, Lesbian                                        |
| Russell                                                                                                                | 2018 | Quantitative | Cross-sectional | Gay, Lesbian                                        |
| Kattari, Walls, & Speer                                                                                                | 2017 | Quantitative | Cross-sectional | Transgender, gender non-conforming                  |
| Kelly, Izienicki, Bimbi, & Parsons                                                                                     | 2011 | Quantitative | Cross-sectional | Gay, Lesbian, Bisexual                              |
